# Supplementary material
Source: MDPI journal article supplement (https://www.mdpi.com/2073-4344/9/12/1034)
Supplement: s1 [file s1]

## Supplementary Information

# In-Situ Catalytic Fast Pyrolysis of Pinecone over HY Catalysts

Jaehun Jeong <sup>1,†</sup>, Hyung Won Lee <sup>1,†</sup>, Seong Ho Jang <sup>2,†</sup>, Sumin Ryu <sup>1</sup>, Young-Min Kim <sup>3</sup>, Rae-su Park <sup>4</sup>, Sang-Chul Jung <sup>5</sup>, Jong-Ki Jeon <sup>6</sup> and Young-Kwon Park <sup>1,\*</sup>

<sup>1</sup> School of Environmental Engineering, University of Seoul, Seoul 130-743, Korea; [hpersona9452@gmail.com](mailto:hpersona9452@gmail.com) (J.J.); [adexhw@nate.com](mailto:adexhw@nate.com) (H.W.L.); [smr4591@gmail.com](mailto:smr4591@gmail.com) (S.R.); [catalica@uos.ac.kr](mailto:catalica@uos.ac.kr) (Y.-K.P.)

<sup>2</sup> Department of BioEnvironmental Energy, Pusan National University, Miryang 50463, Korea; [jangsh@pusan.ac.kr](mailto:jangsh@pusan.ac.kr)

<sup>3</sup> Department of Environmental Engineering, Daegu University, Gyeongsan 38453, Korea; [ymk@daegu.ac.kr](mailto:ymk@daegu.ac.kr)

<sup>4</sup> Department of Bioenvironmental & Chemical Engineering, Chosun College of Science & Technology, Gwangju 501-744, Korea; [rspark01@hanmail.net](mailto:rspark01@hanmail.net)

<sup>5</sup> Department of Environmental Engineering, Sunchun National University, Suncheon 57922, Korea; [jsc@scnu.ac.kr](mailto:jsc@scnu.ac.kr)

<sup>6</sup> Department of Chemical Engineering, Kongju National University, Cheonan 31080, Korea; [jkjeon@kongju.ac.kr](mailto:jkjeon@kongju.ac.kr)

\* Correspondence: [catalica@uos.ac.kr](mailto:catalica@uos.ac.kr); Tel.: +82-2-6490-2870

† Co-first authors

**Preparation of Ni/HY(30):** 1 wt% Ni was impregnated on HY(30) using Ni(NO<sub>3</sub>)<sub>2</sub>. After impregnation, Ni/HY was calcined at 550 °C for 1hr.

**NH<sub>3</sub> TPD analysis:** For the temperature-programmed desorption of ammonia (NH<sub>3</sub>-TPD), a BEL-CAT-B device manufactured by BEL JAPAN was used to analyze the acid strength in the catalyst and the number of acid sites. Prior to the NH<sub>3</sub>-TPD analysis, outgassing of the sample was conducted under a helium flow (50 ml/min) at 550 °C for one hour. After the adsorption of ammonia for 30 min at 100 °C, physically adsorbed ammonia was removed by flowing helium for 2 h. Temperature-programmed desorption of ammonia was then carried out from 100 °C to 550 °C at a heating rate of 10 °C min<sup>-1</sup> under a flow of He gas. The desorbed NH<sub>3</sub> was monitored with a thermal conductivity detector. In order to analyze the types of acid sites over the catalysts, the FT-IR spectra of the adsorbed pyridine were obtained with a Spectrum GX tool equipped with a MCT detector (Perkin Elmer) and an in situ cell containing CaF<sub>2</sub> windows. After degassing of the disk-type catalyst (0.013 g) for 2 h in a vacuum below 1.0 × 10<sup>-2</sup> torr and at 350 °C, pyridine was allowed to absorb onto the catalyst for 30 min at room temperature. The IR spectrum was collected in a temperature range of room temperature to 300 °C under a vacuum below 1.0 × 10<sup>-2</sup> torr.

**Py-GC/MS:** The sample (pine cone or pine cone/HY mixture) was free-fallen to the pyrolyzer heater preheated at 500 °C or 600 °C. The product vapor emitted from the pyrolysis heater was transferred to a deactivated metal capillary column (UA-5, 30 m length × 0.25 mm inner diameter × 0.25 μm inner

diameter) via GC split/splitless inlet (320 °C, split ratio 200:1) and cryo-focused at the front part of the column using liquid nitrogen (-193 °C). After 3 minutes cryo-focusing time, the products was separated in the column by applying GC over temperature program, 40 °C (3 minute hold) for 320 °C (5 minutes hold) at 20 °C/min, and detected in a mass spectroscopy (EI mode, scan range 19 ~ 550). The identification of each peak on the total ion chromatogram was performed by comparing the mass spectrum of each peak with NIST 08<sup>th</sup> or F-Search library..
